# Supplementary figures and images for: Analysis of Default Mode Network in Social Anxiety Disorder: EEG Resting-State Effective Connectivity Study
Source: Preprints.org preprint supplement (doi:10.20944/preprints202102.0610.v1), 2021-02-26

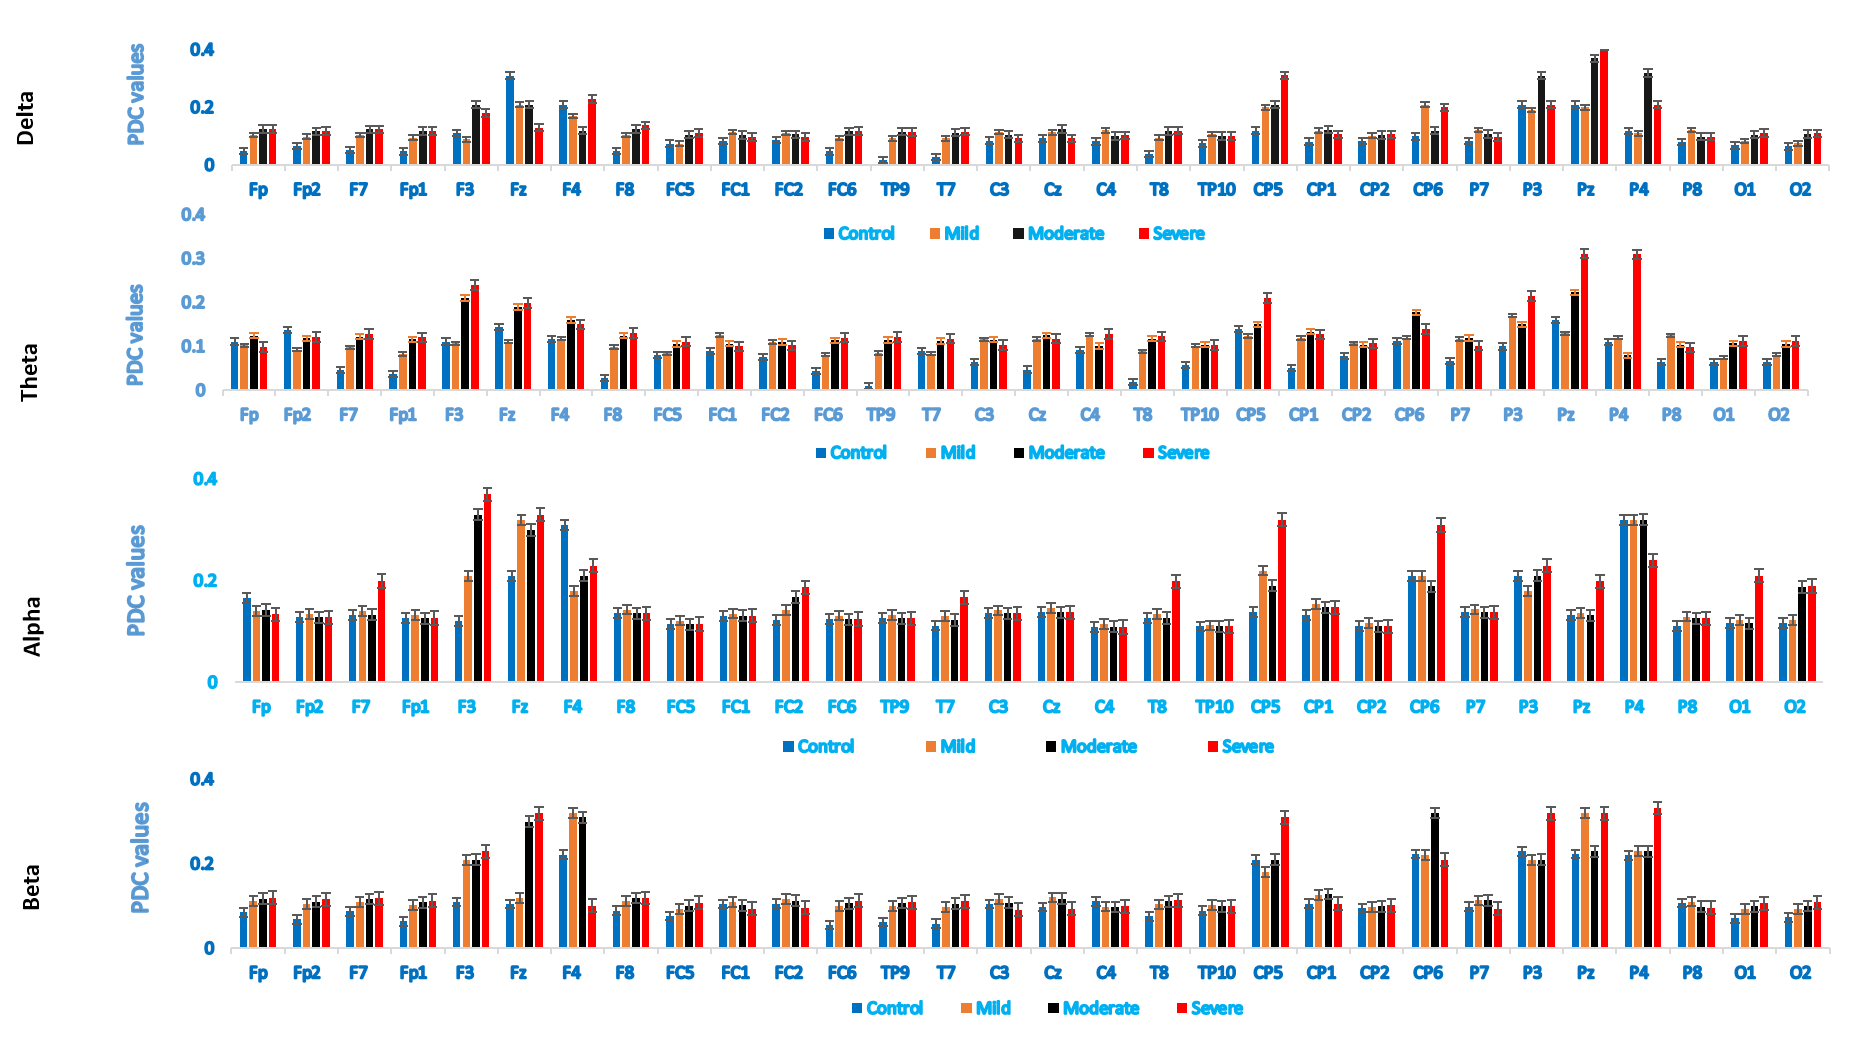

Supplement: Supplementary file 1 [file supplementary]
